# Supplementary material for: CagA Phosphorylation in Helicobacter pylori-Infected B Cells Is Mediated by the Nonreceptor Tyrosine Kinases of the Src and Abl Families
Source: PubMed Central journal article supplement (PMC4995908; doi:10.1128/iai.00349-16), 2016-08-19

**Figure S1**

**A**

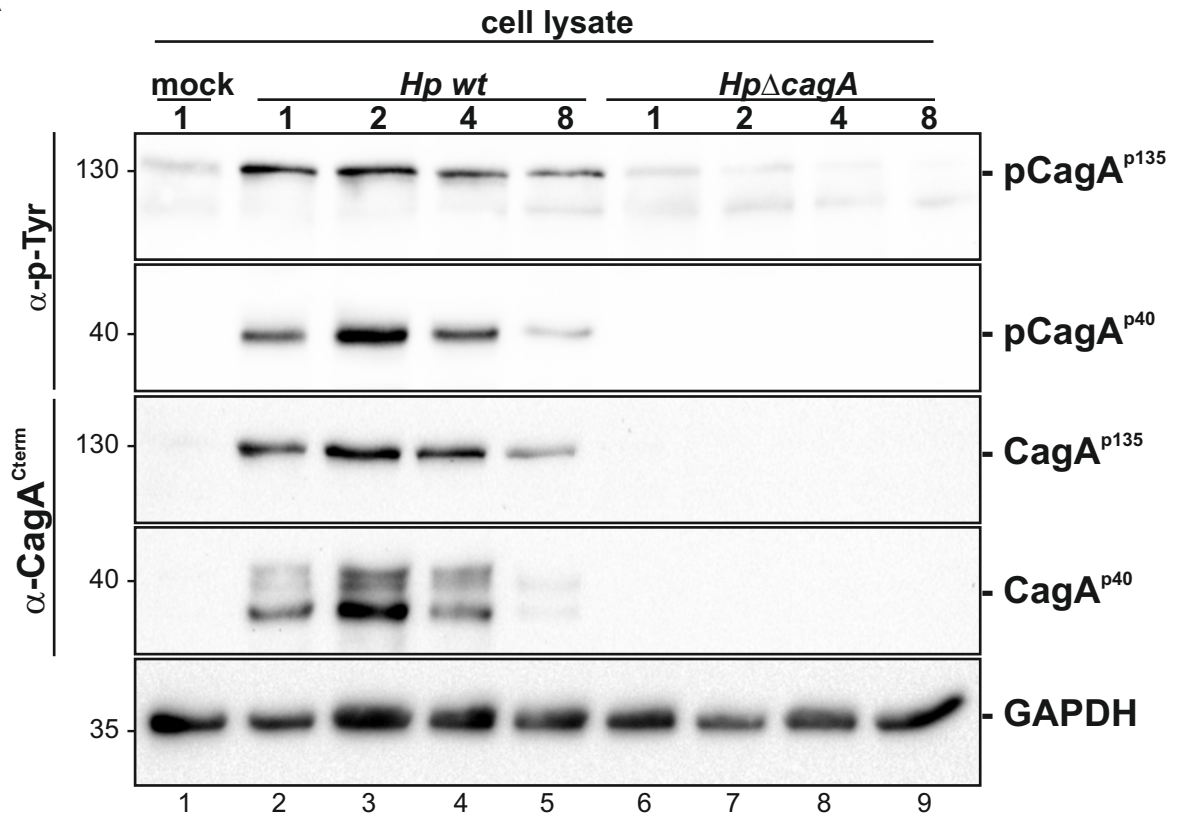

**B**

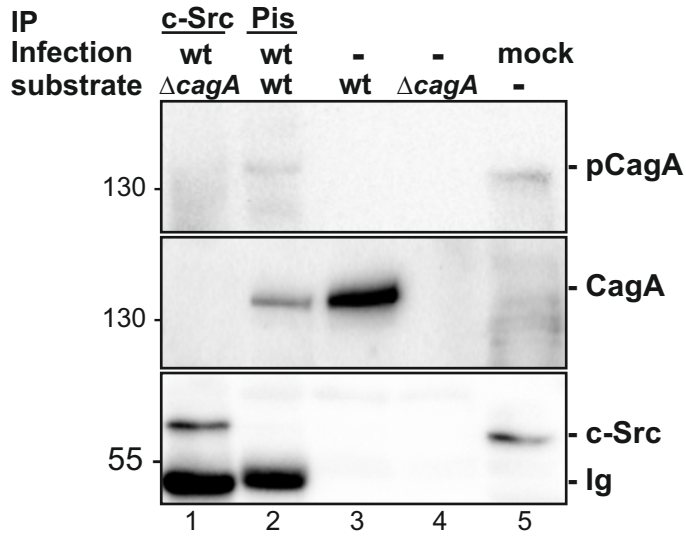

**Figure S2**

**A**

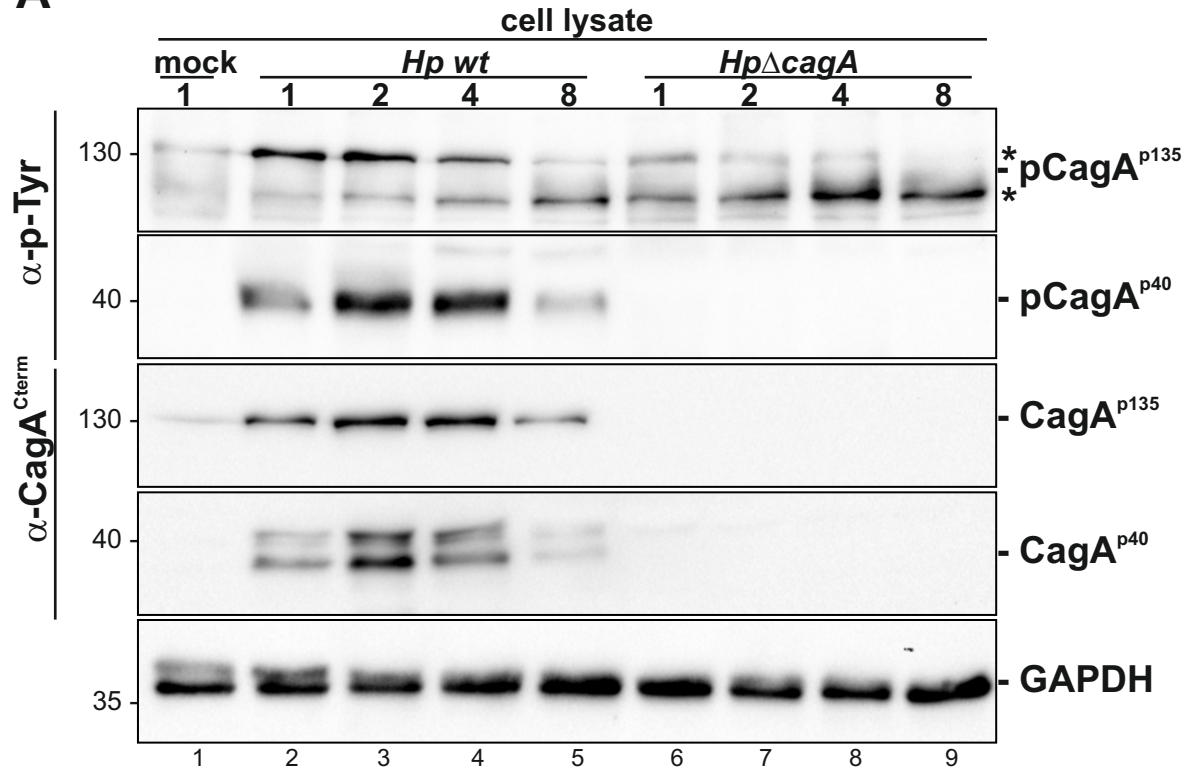

**B**

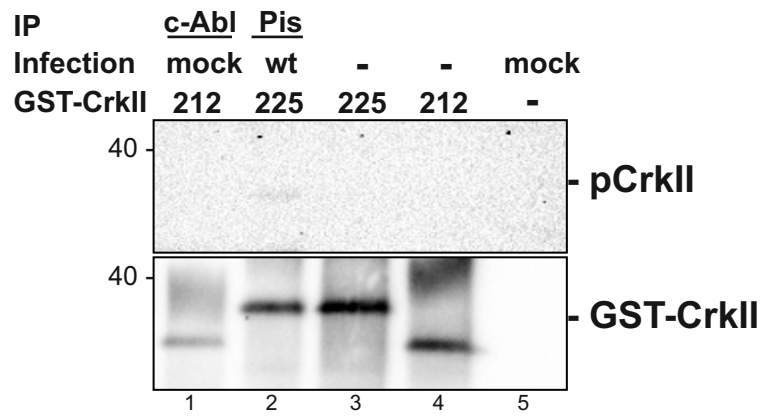

**C**

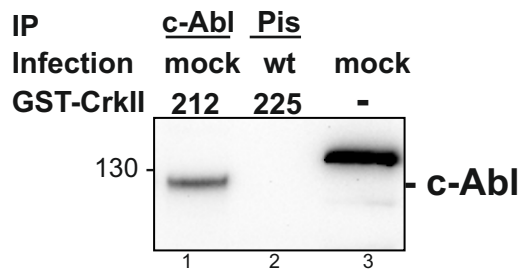

**Figure S3**

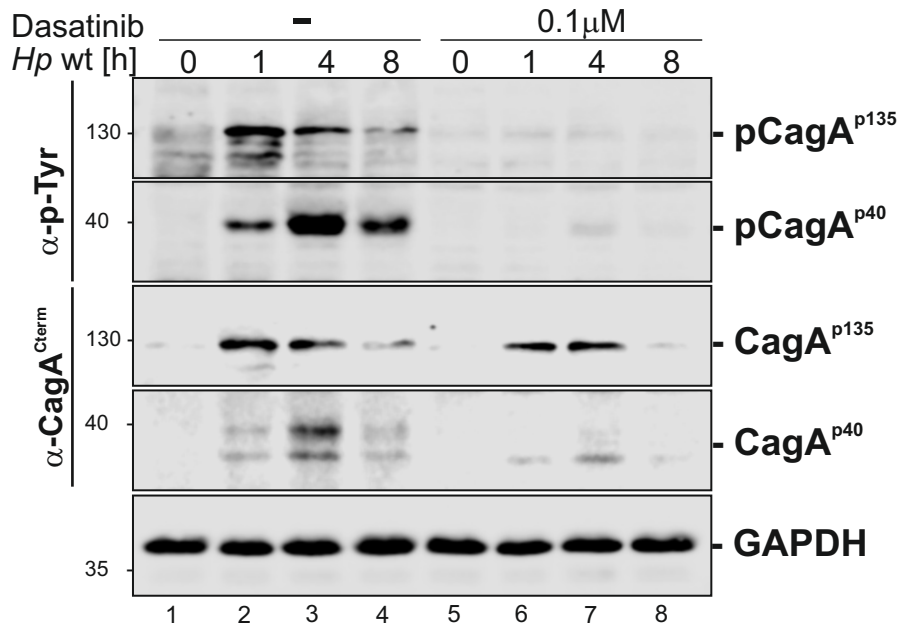

Supplement: IAI.00349-16_zii999091813so1.pdf [file IAI.00349-16_zii999091813so1.pdf]
